# Supplementary material for: Functional eubacteria species along with trans-domain gut inhabitants favour dysgenic diversity in oxalate stone disease
Source: PubMed Central journal article supplement (PMC6226508; doi:10.1038/s41598-018-33773-5), 2018-11-09
Supplement: 41598_2018_33773_MOESM1_ESM.pdf [file 41598_2018_33773_MOESM1_ESM.pdf]

Functional eubacteria species along with trans-domain gut inhabitants  
favour dysgenic diversity in oxalate stone disease

Mangesh Vasant Suryavanshi, Shrikant Subhash Bhute, Rahul Prakash Gune and  
Yogesh Shripad Shouche

Supplementary Table S1: Study subjects and their recorded metadata

| Subject ID                                     | Stone Episode | Stone Position | Family History | Diet | Age | Urine-Spp. Gravity | <i>Oxalobacter</i> Colonization |
|------------------------------------------------|---------------|----------------|----------------|------|-----|--------------------|---------------------------------|
| <b>'Case-control study' recruited subjects</b> |               |                |                |      |     |                    |                                 |
| KSD1                                           | Third         | LUT            | No             | O/N  | 32  | 1.01               | No                              |
| KSD2                                           | Second        | UUT            | No             | Veg  | 32  | 1.01               | No                              |
| KSD3                                           | Second        | UUT            | Yes            | O/N  | 34  | 1                  | No                              |
| KSD4                                           | Second        | UUT            | No             | Veg  | 50  | 1.01               | No                              |
| KSD7                                           | Second        | UUT            | No             | O/N  | 29  | 1.005              | Yes                             |
| KSD9                                           | Second        | LUT            | Yes            | O/N  | 32  | NaN                | No                              |
| KSD10                                          | Second        | UUT            | No             | O/N  | 25  | NaN                | Yes                             |
| KSD12                                          | Second        | UUT            | No             | O/N  | 31  | NaN                | No                              |
| KSD13                                          | Third         | UUT            | No             | O/N  | 36  | NaN                | No                              |
| KSD14                                          | Second        | UUT            | No             | Veg  | 43  | NaN                | No                              |
| KSD20                                          | Second        | UUT            | No             | Veg  | 37  | 1.05               | No                              |
| KSD21                                          | Second        | UUT            | Yes            | O/N  | 50  | 1.01               | No                              |
| KSD22                                          | Second        | LUT            | No             | O/N  | 32  | 1.01               | Yes                             |
| KSD23                                          | Second        | UUT            | No             | O/N  | 28  | 1.01               | No                              |
| KSD24                                          | Second        | UUT            | No             | O/N  | 29  | 1.01               | No                              |
| KSD25                                          | Second        | UUT            | Yes            | O/N  | 50  | 1.01               | No                              |
| KSD26                                          | Second        | UUT            | No             | O/N  | 22  | 1.01               | No                              |
| KSD27                                          | Third         | UUT            | No             | Veg  | 37  | 1.01               | No                              |
| KSD28                                          | Second        | UUT            | No             | O/N  | 28  | 1.01               | Yes                             |
| KSD29                                          | Second        | UUT            | No             | O/N  | 43  | 1.01               | No                              |
| KSD30                                          | Second        | UUT            | No             | Veg  | 50  | NaN                | No                              |

|                                                                        |                      |                       |                       |             |            |                           |                                        |
|------------------------------------------------------------------------|----------------------|-----------------------|-----------------------|-------------|------------|---------------------------|----------------------------------------|
| KSD31                                                                  | Second               | UUT                   | No                    | O/N         | 45         | 1.05                      | No                                     |
| KSD32                                                                  | Third                | UUT                   | No                    | O/N         | 41         | 1                         | No                                     |
| KSD33                                                                  | Second               | UUT                   | No                    | O/N         | 43         | NaN                       | No                                     |
| HLT1                                                                   | No                   | NA                    | No                    | O/N         | 38         | 1.015                     | Yes                                    |
| HLT2                                                                   | No                   | NA                    | No                    | O/N         | 42         | NaN                       | Yes                                    |
| HLT3                                                                   | No                   | NA                    | No                    | O/N         | 52         | NaN                       | Yes                                    |
| <b>Subject ID</b>                                                      | <b>Stone Episode</b> | <b>Stone Position</b> | <b>Family History</b> | <b>Diet</b> | <b>Age</b> | <b>Urine-Spp. Gravity</b> | <b><i>Oxalobacter</i> Colonization</b> |
| HLT4                                                                   | No                   | NA                    | No                    | O/N         | 25         | NaN                       | Yes                                    |
| HLT5                                                                   | No                   | NA                    | No                    | O/N         | 32         | NaN                       | Yes                                    |
| HLT6                                                                   | No                   | NA                    | No                    | Veg         | 36         | 1.01                      | Yes                                    |
| HLT7                                                                   | No                   | NA                    | No                    | Veg         | 45         | NaN                       | Yes                                    |
| HLT8                                                                   | No                   | NA                    | No                    | O/N         | 37         | NaN                       | Yes                                    |
| HLT9                                                                   | No                   | NA                    | No                    | O/N         | 51         | NaN                       | Yes                                    |
| HLT10                                                                  | No                   | NA                    | No                    | O/N         | 32         | NaN                       | Yes                                    |
| HLT11                                                                  | No                   | NA                    | No                    | O/N         | 28         | NaN                       | Yes                                    |
| HLT12                                                                  | No                   | NA                    | No                    | O/N         | 29         | 1                         | Yes                                    |
| HLT13                                                                  | No                   | NA                    | No                    | O/N         | 40         | 1.01                      | Yes                                    |
| HLT14                                                                  | No                   | NA                    | No                    | O/N         | 22         | 1.01                      | Yes                                    |
| HLT15                                                                  | No                   | NA                    | No                    | O/N         | 27         | 1.01                      | Yes                                    |
| <b>'Healthy-control study' recruited subjects (under HLT category)</b> |                      |                       |                       |             |            |                           |                                        |
| CV1                                                                    | No                   | NA                    | No                    | O/N         | 33         | NaN                       | Yes                                    |
| CV2                                                                    | No                   | NA                    | No                    | O/N         | 34         | NaN                       | Yes                                    |
| CV3                                                                    | No                   | NA                    | No                    | O/N         | 29         | NaN                       | Yes                                    |
| CV4                                                                    | No                   | NA                    | No                    | O/N         | 37         | NaN                       | Yes                                    |
| CV5                                                                    | No                   | NA                    | No                    | O/N         | 36         | NaN                       | Yes                                    |
| CV6                                                                    | No                   | NA                    | No                    | O/N         | 34         | NaN                       | Yes                                    |
| CV7                                                                    | No                   | NA                    | No                    | O/N         | 28         | NaN                       | Yes                                    |
| CV8                                                                    | No                   | NA                    | No                    | O/N         | 39         | NaN                       | Yes                                    |
| CV9                                                                    | No                   | NA                    | No                    | O/N         | 27         | NaN                       | Yes                                    |
| CV10                                                                   | No                   | NA                    | No                    | O/N         | 28         | NaN                       | Yes                                    |

|                   |                      |                       |                       |             |            |                           |                                        |
|-------------------|----------------------|-----------------------|-----------------------|-------------|------------|---------------------------|----------------------------------------|
| CV11              | No                   | NA                    | No                    | O/N         | 28         | NaN                       | Yes                                    |
| CV12              | No                   | NA                    | No                    | O/N         | 30         | NaN                       | Yes                                    |
| CV13              | No                   | NA                    | No                    | O/N         | 27         | NaN                       | Yes                                    |
| CV14              | No                   | NA                    | No                    | Veg         | 25         | NaN                       | Yes                                    |
| CV15              | No                   | NA                    | No                    | O/N         | 28         | NaN                       | Yes                                    |
| CV16              | No                   | NA                    | No                    | O/N         | 28         | NaN                       | Yes                                    |
| <b>Subject ID</b> | <b>Stone Episode</b> | <b>Stone Position</b> | <b>Family History</b> | <b>Diet</b> | <b>Age</b> | <b>Urine-Spp. Gravity</b> | <b><i>Oxalobacter</i> Colonization</b> |
| CV17              | No                   | NA                    | No                    | O/N         | 31         | NaN                       | Yes                                    |
| CV18              | No                   | NA                    | No                    | O/N         | 28         | NaN                       | Yes                                    |
| CV19              | No                   | NA                    | No                    | O/N         | 25         | NaN                       | Yes                                    |
| CV20              | No                   | NA                    | No                    | O/N         | 25         | NaN                       | Yes                                    |
| CV21              | No                   | NA                    | No                    | Veg         | 31         | NaN                       | Yes                                    |
| CV22              | No                   | NA                    | No                    | O/N         | 30         | NaN                       | Yes                                    |
| CV23              | No                   | NA                    | No                    | O/N         | 30         | NaN                       | Yes                                    |
| CV24              | No                   | NA                    | No                    | O/N         | 27         | NaN                       | Yes                                    |
| CV25              | No                   | NA                    | No                    | O/N         | 28         | NaN                       | Yes                                    |
| CV26              | No                   | NA                    | No                    | O/N         | 40         | NaN                       | Yes                                    |
| CV27              | No                   | NA                    | No                    | O/N         | 30         | NaN                       | Yes                                    |
| CV28              | No                   | NA                    | No                    | O/N         | 28         | NaN                       | Yes                                    |
| CV29              | No                   | NA                    | No                    | O/N         | 36         | NaN                       | Yes                                    |
| CV30              | No                   | NA                    | No                    | O/N         | 30         | NaN                       | Yes                                    |
| CV31              | No                   | NA                    | No                    | O/N         | 29         | NaN                       | Yes                                    |
| CV32              | No                   | NA                    | No                    | O/N         | 27         | NaN                       | Yes                                    |
| CV33              | No                   | NA                    | No                    | O/N         | 36         | NaN                       | Yes                                    |
| CV34              | No                   | NA                    | No                    | O/N         | 38         | NaN                       | Yes                                    |

LUT= Lower Urinary Tract position; UUT= Upper Urinary Tract position; NA= Not Any; O/N= Occasional Non-veg diet; NaN= None Recorded generated.

‘Case-control study’ recruited subjects are adopted from *Suryavanshi et. al. 2016*.

Supplementary Table S3: List of Eubacteria-functional species derived from targeted-metagenome

| Functional species                       | KSD_HLT | KSD_OX_COL | KSD_OX_N_COL | KSD_FH | KSD_THIRD |
|------------------------------------------|---------|------------|--------------|--------|-----------|
| <b><i>frc</i>-gene sequence taxonomy</b> |         |            |              |        |           |
| Ahrensia sp.                             | 7       | 0          | 0            | 0      | 0         |
| [Clostridium] difficile                  | 3       | 0          | 0            | 0      | 0         |
| Blautia hansenii                         | 3       | 0          | 0            | 0      | 0         |
| Prevotella buccae                        | 3       | 0          | 0            | 0      | 0         |
| Acinetobacter radioresistens             | 2       | 0          | 0            | 0      | 0         |
| Eubacterium dolichum                     | 2       | 0          | 0            | 0      | 0         |
| Eubacterium ventriosum                   | 2       | 0          | 0            | 0      | 0         |
| [Ruminococcus] gnavus                    | 1       | 0          | 0            | 0      | 0         |
| Ancylobacter polymorphus                 | 1       | 0          | 0            | 0      | 0         |
| Clostridium tetani                       | 1       | 0          | 0            | 0      | 0         |
| Neisseria meningitidis                   | 1       | 0          | 0            | 0      | 0         |
| Oxalobacter formigenes                   | 2451    | 1164       | 0            | 0      | 0         |
| Yersinia pestis                          | 0       | 1587       | 0            | 69     | 0         |
| Salmonella enterica                      | 0       | 648        | 1            | 4      | 32        |
| uncultured bacterium                     | 0       | 377        | 0            | 0      | 0         |
| Yersinia pseudotuberculosis              | 0       | 303        | 0            | 13     | 0         |
| Xanthobacter autotrophicus               | 0       | 286        | 0            | 0      | 0         |
| Enterobacter cancerogenus                | 0       | 54         | 0            | 0      | 0         |
| Serratia proteamaculans                  | 0       | 44         | 0            | 1      | 0         |
| Klebsiella pneumoniae                    | 0       | 37         | 11           | 0      | 34        |
| Enterobacter cloacae                     | 0       | 24         | 25           | 10     | 8         |
| Clostridium sp.                          | 0       | 24         | 9            | 8      | 26        |
| Shigella flexneri                        | 0       | 20         | 0            | 20     | 28        |
| Bacteroides vulgatus                     | 0       | 17         | 0            | 3      | 126       |
| Subdoligranulum variabile                | 0       | 15         | 0            | 8      | 0         |
| Holdemania filiformis                    | 0       | 15         | 0            | 0      | 2         |
| Enterobacter sp.                         | 0       | 11         | 0            | 0      | 2         |
| Parabacteroides merdae                   | 0       | 7          | 1            | 0      | 14        |
| Eubacterium rectale                      | 0       | 6          | 0            | 2      | 42        |
| Parabacteroides distasonis               | 0       | 6          | 0            | 0      | 60        |
| Arthrobacter aurescens                   | 0       | 6          | 0            | 0      | 0         |
| Edwardsiella tarda                       | 0       | 5          | 0            | 1      | 0         |
| Photorhabdus asymbiotica                 | 0       | 5          | 0            | 0      | 0         |
| Citrobacter koseri                       | 0       | 3          | 7            | 0      | 6         |
| Leptothrix cholodnii                     | 0       | 3          | 0            | 0      | 0         |

|                                          |   |   |     |    |     |
|------------------------------------------|---|---|-----|----|-----|
| <b>Methylobacterium nodulans</b>         | 0 | 3 | 0   | 0  | 0   |
| <b>Clostridium hylemonae</b>             | 0 | 2 | 0   | 2  | 2   |
| <b>Mitsuokella multacida</b>             | 0 | 2 | 0   | 0  | 62  |
| <b>Bacteroides ovatus</b>                | 0 | 2 | 0   | 0  | 8   |
| <b>[Ruminococcus] obeum</b>              | 0 | 2 | 0   | 0  | 1   |
| <b>Achromobacter piechaudii</b>          | 0 | 2 | 0   | 0  | 0   |
| <b>Anaerostipes caccae</b>               | 0 | 2 | 0   | 0  | 0   |
| <b>Prevotella marshii</b>                | 0 | 2 | 0   | 0  | 0   |
| <b>Yersinia bercovieri</b>               | 0 | 2 | 0   | 0  | 0   |
| <b>Yersinia mollaretii</b>               | 0 | 2 | 0   | 0  | 0   |
| <b>Ethanoligenens harbinense</b>         | 0 | 1 | 0   | 1  | 2   |
| <b>Bacillus sp.</b>                      | 0 | 1 | 0   | 0  | 0   |
| <b>Clostridium asparagiforme</b>         | 0 | 1 | 0   | 0  | 0   |
| <b>Bifidobacterium adolescentis</b>      | 0 | 0 | 144 | 21 | 216 |
| <b>Nocardiopsis dassonvillei</b>         | 0 | 0 | 57  | 6  | 0   |
| <b>Bifidobacterium dentium</b>           | 0 | 0 | 15  | 0  | 100 |
| <b>Bifidobacterium angulatum</b>         | 0 | 0 | 14  | 0  | 4   |
| <b>Ruminococcus lactaris</b>             | 0 | 0 | 10  | 0  | 8   |
| <b>Bifidobacterium catenulatum</b>       | 0 | 0 | 6   | 0  | 6   |
| <b>Veillonella parvula</b>               | 0 | 0 | 5   | 0  | 0   |
| <b>Yersinia enterocolitica</b>           | 0 | 0 | 5   | 0  | 0   |
| <b>Lactobacillus ruminis</b>             | 0 | 0 | 4   | 0  | 13  |
| <b>Clostridium saccharolyticum</b>       | 0 | 0 | 4   | 0  | 0   |
| <b>Escherichia fergusonii</b>            | 0 | 0 | 4   | 0  | 0   |
| <b>Edwardsiella ictaluri</b>             | 0 | 0 | 3   | 0  | 0   |
| <b>Sutterella wadsworthensis</b>         | 0 | 0 | 2   | 0  | 5   |
| <b>Acidovorax ebreus</b>                 | 0 | 0 | 2   | 0  | 0   |
| <b>Acidovorax sp.</b>                    | 0 | 0 | 2   | 0  | 0   |
| <b>Caldanaerobacter subterraneus</b>     | 0 | 0 | 2   | 0  | 0   |
| <b>Citrobacter freundii</b>              | 0 | 0 | 2   | 0  | 0   |
| <b>Lactobacillus salivarius</b>          | 0 | 0 | 2   | 0  | 0   |
| <b>Prevotella bivia</b>                  | 0 | 0 | 2   | 0  | 0   |
| <b>Shigella sonnei</b>                   | 0 | 0 | 1   | 4  | 8   |
| <b>Lactobacillus plantarum</b>           | 0 | 0 | 1   | 0  | 1   |
| <b>Bradyrhizobium genosp. TUXTLAS-23</b> | 0 | 0 | 1   | 0  | 0   |
| <b>Citrobacter rodentium</b>             | 0 | 0 | 1   | 0  | 0   |
| <b>Cronobacter turicensis</b>            | 0 | 0 | 1   | 0  | 0   |

|                                          |   |   |   |      |      |
|------------------------------------------|---|---|---|------|------|
| <b>Pantoea sp.</b>                       | 0 | 0 | 2 | 0    | 0    |
| <b>Serratia marcescens</b>               | 0 | 0 | 1 | 0    | 0    |
| <b>Oligotropha carboxidovorans</b>       | 0 | 0 | 0 | 1064 | 0    |
| <b>Actinobacillus pleuropneumoniae</b>   | 0 | 0 | 0 | 21   | 0    |
| <b>Prevotella bergensis</b>              | 0 | 0 | 0 | 10   | 0    |
| <b>Shigella boydii</b>                   | 0 | 0 | 0 | 9    | 18   |
| <b>Polaromonas sp. JS666</b>             | 0 | 0 | 0 | 5    | 1114 |
| <b>Cryptobacterium curtum</b>            | 0 | 0 | 0 | 3    | 3    |
| <b>Shigella sp.</b>                      | 0 | 0 | 0 | 2    | 4    |
| <b>Prevotella buccalis</b>               | 0 | 0 | 0 | 2    | 0    |
| <b>Succinatimonas hippei</b>             | 0 | 0 | 0 | 1    | 1    |
| <b>[Ruminococcus] torques</b>            | 0 | 0 | 0 | 1    | 0    |
| <b>Clostridium kluyveri</b>              | 0 | 0 | 0 | 1    | 0    |
| <b>Coprococcus catus</b>                 | 0 | 0 | 0 | 1    | 0    |
| <b>Flavobacteria bacterium BAL38</b>     | 0 | 0 | 0 | 1    | 0    |
| <b>Prevotella nigrescens</b>             | 0 | 0 | 0 | 1    | 0    |
| <b>Bacteroides coprophilus</b>           | 0 | 0 | 0 | 0    | 90   |
| <b>Bacteroides stercoris</b>             | 0 | 0 | 0 | 0    | 41   |
| <b>Bacteroides coprocola</b>             | 0 | 0 | 0 | 0    | 37   |
| <b>Coprococcus comes</b>                 | 0 | 0 | 0 | 0    | 12   |
| <b>Bacteroides caccae</b>                | 0 | 0 | 0 | 0    | 10   |
| <b>Prevotella ruminicola</b>             | 0 | 0 | 0 | 0    | 10   |
| <b>Dorea longicatena</b>                 | 0 | 0 | 0 | 0    | 8    |
| <b>Eubacterium bifforme</b>              | 0 | 0 | 0 | 0    | 8    |
| <b>Acinetobacter baumannii</b>           | 0 | 0 | 0 | 0    | 6    |
| <b>Bifidobacterium pseudocatenulatum</b> | 0 | 0 | 0 | 0    | 4    |
| <b>Eubacterium siraeum</b>               | 0 | 0 | 0 | 0    | 4    |
| <b>Acinetobacter sp.</b>                 | 0 | 0 | 0 | 0    | 3    |
| <b>Porphyromonas gingivalis</b>          | 0 | 0 | 0 | 0    | 3    |
| <b>Stenotrophomonas maltophilia</b>      | 0 | 0 | 0 | 0    | 3    |
| <b>Bacteroides dorei</b>                 | 0 | 0 | 0 | 0    | 2    |
| <b>Bacteroides uniformis</b>             | 0 | 0 | 0 | 0    | 2    |
| <b>Dialister invisus</b>                 | 0 | 0 | 0 | 0    | 2    |
| <b>Acinetobacter nosocomialis</b>        | 0 | 0 | 0 | 0    | 1    |
| <b>Acinetobacter pittii</b>              | 0 | 0 | 0 | 0    | 1    |
| <b>Bacteroides xylanisolvens</b>         | 0 | 0 | 0 | 0    | 1    |
| <b>Bilophila wadsworthia</b>             | 0 | 0 | 0 | 0    | 1    |
| <b>Eubacterium acidaminophilum</b>       | 0 | 0 | 0 | 0    | 1    |

|                                          |     |     |     |      |     |
|------------------------------------------|-----|-----|-----|------|-----|
| Eubacterium<br>cellulosolvens            | 0   | 0   | 0   | 0    | 1   |
| Megamonas<br>hypermegale                 | 0   | 0   | 0   | 0    | 1   |
| Stenotrophomonas sp.                     | 0   | 0   | 0   | 0    | 1   |
| <b><i>but</i>-gene sequence taxonomy</b> |     |     |     |      |     |
| [Clostridium] difficile                  | 0   | 1   | 0   | 12   | 0   |
| [Ruminococcus] gnavus                    | 0   | 3   | 0   | 0    | 0   |
| [Ruminococcus] obeum                     | 2   | 2   | 0   | 3    | 0   |
| [Ruminococcus] torques                   | 0   | 1   | 0   | 13   | 1   |
| Acidaminococcus<br>fermentans            | 10  | 14  | 0   | 0    | 18  |
| Actinomyces<br>odontolyticus             | 0   | 0   | 0   | 2    | 0   |
| Actinomyces sp.                          | 0   | 0   | 0   | 0    | 1   |
| Akkermansia<br>muciniphila               | 0   | 3   | 6   | 3    | 0   |
| Alistipes putredinis                     | 0   | 20  | 0   | 0    | 3   |
| Alistipes shahii                         | 1   | 7   | 0   | 0    | 1   |
| Alistipes sp.                            | 4   | 10  | 1   | 4    | 4   |
| Anaerostipes caccae                      | 6   | 12  | 0   | 0    | 0   |
| Arthrobacter aurescens                   | 0   | 396 | 3   | 18   | 0   |
| Arthrobacter sp.                         | 0   | 162 | 0   | 0    | 0   |
| Atopobium rimae                          | 0   | 2   | 0   | 0    | 1   |
| Azoarcus sp.                             | 0   | 4   | 0   | 0    | 0   |
| Bacillus cellulosilyticus                | 2   | 0   | 0   | 2    | 0   |
| Bacteroides caccae                       | 0   | 1   | 2   | 2    | 2   |
| Bacteroides<br>cellulosilyticus          | 0   | 0   | 0   | 2    | 0   |
| Bacteroides coprocola                    | 0   | 24  | 0   | 24   | 8   |
| Bacteroides coprophilus                  | 0   | 0   | 0   | 6    | 68  |
| Bacteroides dorei                        | 6   | 16  | 6   | 8    | 20  |
| Bacteroides eggerthii                    | 7   | 16  | 2   | 8    | 10  |
| Bacteroides finegoldii                   | 0   | 0   | 0   | 0    | 2   |
| Bacteroides fragilis                     | 243 | 85  | 4   | 39   | 296 |
| Bacteroides helcogenes                   | 0   | 0   | 0   | 2    | 0   |
| Bacteroides intestinalis                 | 6   | 25  | 14  | 13   | 11  |
| Bacteroides ovatus                       | 1   | 7   | 3   | 5    | 11  |
| Bacteroides plebeius                     | 9   | 16  | 0   | 15   | 10  |
| Bacteroides sp.                          | 117 | 93  | 19  | 56   | 166 |
| Bacteroides stercoris                    | 12  | 16  | 4   | 8    | 12  |
| Bacteroides<br>thetaiotaomicron          | 0   | 2   | 0   | 20   | 2   |
| Bacteroides uniformis                    | 0   | 14  | 0   | 0    | 53  |
| Bacteroides vulgatus                     | 5   | 24  | 19  | 38   | 13  |
| Bacteroides<br>xylanisolvens             | 2   | 14  | 2   | 8    | 12  |
| Bifidobacterium                          | 103 | 85  | 537 | 1247 | 372 |

|                                             |     |     |     |      |      |
|---------------------------------------------|-----|-----|-----|------|------|
| <b>adolescentis</b>                         |     |     |     |      |      |
| <b>Bifidobacterium angulatum</b>            | 4   | 4   | 14  | 58   | 18   |
| <b>Bifidobacterium animalis</b>             | 0   | 0   | 0   | 5    | 0    |
| <b>Bifidobacterium bifidum</b>              | 4   | 8   | 12  | 39   | 46   |
| <b>Bifidobacterium breve</b>                | 0   | 0   | 5   | 45   | 2    |
| <b>Bifidobacterium catenulatum</b>          | 32  | 3   | 11  | 36   | 34   |
| <b>Bifidobacterium dentium</b>              | 3   | 5   | 60  | 93   | 2    |
| <b>Bifidobacterium longum</b>               | 108 | 173 | 974 | 2165 | 1924 |
| <b>Bifidobacterium pseudocatenulatum</b>    | 23  | 0   | 0   | 45   | 60   |
| <b>Bifidobacterium sp.</b>                  | 4   | 12  | 42  | 126  | 157  |
| <b>Bilophila wadsworthia</b>                | 0   | 0   | 1   | 1    | 1    |
| <b>Blautia hansenii</b>                     | 0   | 0   | 0   | 2    | 0    |
| <b>Brachybacterium faecium</b>              | 0   | 1   | 0   | 0    | 0    |
| <b>Brachyspira murdochii</b>                | 0   | 218 | 0   | 0    | 0    |
| <b>butyrate-producing bacterium SS3/4</b>   | 5   | 2   | 0   | 0    | 6    |
| <b>butyrate-producing bacterium SSC/2</b>   | 1   | 0   | 0   | 0    | 4    |
| <b>Butyrivibrio fibrisolvens</b>            | 4   | 1   | 0   | 0    | 0    |
| <b>Caldicellulosiruptor bescii</b>          | 0   | 6   | 0   | 0    | 0    |
| <b>Caldicellulosiruptor saccharolyticus</b> | 0   | 14  | 0   | 0    | 0    |
| <b>Candidatus Solibacter usitatus</b>       | 0   | 0   | 1   | 0    | 0    |
| <b>Candidatus Zinderia insecticola</b>      | 1   | 0   | 0   | 0    | 0    |
| <b>Carboxydotherrmus hydrogenoformans</b>   | 6   | 0   | 0   | 0    | 0    |
| <b>Citrobacter koseri</b>                   | 0   | 9   | 7   | 0    | 6    |
| <b>Citrobacter sp.</b>                      | 0   | 4   | 1   | 0    | 0    |
| <b>Citrobacter youngae</b>                  | 0   | 2   | 0   | 0    | 0    |
| <b>Clostridiales bacterium</b>              | 3   | 0   | 7   | 2    | 1    |
| <b>Clostridium acetobutylicum</b>           | 0   | 0   | 0   | 0    | 2    |
| <b>Clostridium asparagiforme</b>            | 0   | 8   | 0   | 10   | 0    |
| <b>Clostridium beijerinckii</b>             | 0   | 0   | 0   | 0    | 2    |
| <b>Clostridium bolteae</b>                  | 0   | 0   | 0   | 3    | 7    |
| <b>Clostridium botulinum</b>                | 0   | 538 | 0   | 22   | 2    |
| <b>Clostridium carboxidivorans</b>          | 1   | 0   | 0   | 0    | 0    |
| <b>Clostridium cellulolyticum</b>           | 0   | 0   | 0   | 0    | 1    |
| <b>Clostridium hathewayi</b>                | 0   | 5   | 0   | 0    | 0    |



|                                                |      |       |      |      |     |
|------------------------------------------------|------|-------|------|------|-----|
| <i>Clostridium leptum</i>                      | 0    | 2     | 0    | 0    | 1   |
| <i>Clostridium ljungdahlii</i>                 | 0    | 4     | 0    | 0    | 0   |
| <i>Clostridium methylpentosum</i>              | 5    | 0     | 0    | 0    | 1   |
| <i>Clostridium nexile</i>                      | 2    | 0     | 0    | 4    | 2   |
| <i>Clostridium phytofermentans</i>             | 0    | 0     | 0    | 11   | 0   |
| <i>Clostridium scindens</i>                    | 0    | 0     | 0    | 0    | 2   |
| <i>Clostridium sp.</i>                         | 29   | 11    | 3    | 12   | 15  |
| <i>Clostridium thermocellum</i>                | 16   | 0     | 0    | 0    | 0   |
| <i>Collinsella aerofaciens</i>                 | 24   | 21    | 18   | 31   | 40  |
| <i>Collinsella intestinalis</i>                | 0    | 0     | 0    | 2    | 3   |
| <i>Coprobacillus sp.</i>                       | 0    | 0     | 0    | 1    | 0   |
| <i>Coprococcus catus</i>                       | 2    | 1     | 2    | 1    | 0   |
| <i>Coprococcus eutactus</i>                    | 2    | 20    | 1    | 0    | 6   |
| <i>Coprococcus sp.</i>                         | 0    | 0     | 0    | 0    | 2   |
| <i>Cronobacter sakazakii</i>                   | 2    | 17    | 0    | 2    | 0   |
| <i>Cronobacter turicensis</i>                  | 0    | 0     | 0    | 1    | 0   |
| <i>Cryptobacterium curtum</i>                  | 0    | 0     | 3    | 3    | 0   |
| <i>Desulfitobacterium hafniense</i>            | 0    | 0     | 1    | 0    | 0   |
| <i>Dialister invisus</i>                       | 0    | 0     | 0    | 32   | 0   |
| <i>Dialister microaerophilus</i>               | 0    | 3     | 0    | 1    | 0   |
| <i>Dickeya dadantii</i>                        | 0    | 1     | 0    | 0    | 0   |
| <i>Dinoroseobacter shibae</i>                  | 0    | 4     | 0    | 0    | 0   |
| <i>Dorea formicigenerans</i>                   | 0    | 2     | 0    | 0    | 0   |
| <i>Dorea longicatena</i>                       | 6    | 0     | 3    | 0    | 15  |
| <i>Edwardsiella tarda</i>                      | 0    | 1     | 0    | 0    | 0   |
| <i>Eggerthella lenta</i>                       | 0    | 0     | 0    | 0    | 8   |
| <i>Eggerthella sp.</i>                         | 0    | 0     | 0    | 0    | 2   |
| <i>Enterobacter aerogenes</i>                  | 1    | 0     | 0    | 0    | 1   |
| <i>Enterobacter cancerogenus</i>               | 0    | 4     | 0    | 0    | 0   |
| <i>Enterobacter cloacae</i>                    | 3    | 200   | 51   | 19   | 6   |
| <i>Enterobacter sp.</i>                        | 0    | 71    | 12   | 10   | 0   |
| <i>Erysipelotrichaceae bacterium 5_2_54FAA</i> | 2    | 0     | 1    | 0    | 3   |
| <i>Escherichia coli</i>                        | 1173 | 26102 | 4440 | 3210 | 802 |
| <i>Escherichia fergusonii</i>                  | 4    | 19    | 4    | 4    | 4   |
| <i>Escherichia sp.</i>                         | 12   | 256   | 33   | 28   | 6   |
| <i>Eubacterium bifforme</i>                    | 0    | 0     | 0    | 2    | 0   |
| <i>Eubacterium cellulosolvens</i>              | 1    | 1     | 0    | 0    | 0   |
| <i>Eubacterium dolichum</i>                    | 0    | 4     | 0    | 0    | 2   |
| <i>Eubacterium eligens</i>                     | 0    | 1     | 0    | 0    | 0   |
| <i>Eubacterium hallii</i>                      | 0    | 53    | 11   | 11   | 3   |

|                                       |     |      |     |     |     |
|---------------------------------------|-----|------|-----|-----|-----|
| <b>Eubacterium limosum</b>            | 0   | 0    | 0   | 66  | 0   |
| <b>Eubacterium rectale</b>            | 783 | 1240 | 282 | 381 | 198 |
| <b>Eubacterium siraeum</b>            | 0   | 0    | 0   | 0   | 3   |
| <b>Eubacterium ventriosum</b>         | 0   | 4    | 0   | 0   | 4   |
| <b>Faecalibacterium prausnitzii</b>   | 270 | 402  | 243 | 194 | 176 |
| <b>Fibrobacter succinogenes</b>       | 0   | 0    | 0   | 5   | 0   |
| <b>Fusobacterium ulcerans</b>         | 2   | 0    | 0   | 0   | 0   |
| <b>Gardnerella vaginalis</b>          | 0   | 0    | 0   | 4   | 0   |
| <b>Haemophilus haemoglobinophilus</b> | 0   | 0    | 0   | 1   | 0   |
| <b>Haemophilus influenzae</b>         | 3   | 0    | 0   | 0   | 0   |
| <b>Holdemania filiformis</b>          | 12  | 0    | 0   | 23  | 2   |
| <b>Ilyobacter polytropus</b>          | 1   | 0    | 0   | 0   | 0   |
| <b>Klebsiella pneumoniae</b>          | 14  | 393  | 13  | 39  | 126 |
| <b>Klebsiella sp.</b>                 | 0   | 17   | 0   | 0   | 4   |
| <b>Klebsiella variicola</b>           | 1   | 39   | 0   | 8   | 12  |
| <b>Kocuria rhizophila</b>             | 0   | 1    | 0   | 18  | 0   |
| <b>Lactobacillus delbrueckii</b>      | 0   | 4    | 0   | 0   | 0   |
| <b>Lactobacillus gasseri</b>          | 7   | 0    | 0   | 0   | 0   |
| <b>Lactobacillus johnsonii</b>        | 0   | 0    | 0   | 0   | 3   |
| <b>Lactobacillus plantarum</b>        | 1   | 0    | 0   | 0   | 0   |
| <b>Lactobacillus ruminis</b>          | 0   | 6    | 18  | 42  | 9   |
| <b>Lactococcus lactis</b>             | 0   | 0    | 0   | 1   | 0   |
| <b>Legionella pneumophila</b>         | 1   | 0    | 0   | 0   | 0   |
| <b>Lutiella nitroferrum</b>           | 0   | 2    | 0   | 0   | 0   |
| <b>Megamonas hypermegale</b>          | 1   | 0    | 0   | 1   | 0   |
| <b>Megasphaera micronuciformis</b>    | 0   | 1    | 0   | 0   | 0   |
| <b>Methylococcus capsulatus</b>       | 0   | 0    | 0   | 0   | 4   |
| <b>Mitsuokella multacida</b>          | 0   | 18   | 0   | 5   | 30  |
| <b>Neisseria flavescens</b>           | 1   | 0    | 0   | 0   | 0   |
| <b>Neisseria meningitidis</b>         | 4   | 3    | 0   | 0   | 0   |
| <b>Nitrosomonas europaea</b>          | 0   | 4    | 0   | 0   | 0   |
| <b>Olsenella uli</b>                  | 0   | 0    | 0   | 1   | 0   |
| <b>Paenibacillus sp.</b>              | 2   | 0    | 0   | 0   | 0   |
| <b>Paludibacter propionigenes</b>     | 0   | 0    | 0   | 0   | 1   |
| <b>Pantoea sp.</b>                    | 0   | 4    | 0   | 2   | 0   |
| <b>Pantoea vagans</b>                 | 0   | 1    | 0   | 0   | 0   |
| <b>Parabacteroides distasonis</b>     | 53  | 16   | 5   | 13  | 44  |
| <b>Parabacteroides johnsonii</b>      | 8   | 23   | 8   | 8   | 24  |
| <b>Parabacteroides merdae</b>         | 32  | 57   | 38  | 44  | 38  |

|                                         |     |     |     |    |    |
|-----------------------------------------|-----|-----|-----|----|----|
| <b>Parabacteroides sp.</b>              | 2   | 0   | 0   | 0  | 1  |
| <b>Pectobacterium atrosepticum</b>      | 0   | 2   | 0   | 0  | 0  |
| <b>Pectobacterium carotovorum</b>       | 0   | 7   | 0   | 0  | 0  |
| <b>Pectobacterium wasabiae</b>          | 0   | 3   | 0   | 0  | 0  |
| <b>Pediococcus acidilactici</b>         | 4   | 0   | 0   | 0  | 0  |
| <b>Pelobacter carbinolicus</b>          | 0   | 0   | 0   | 6  | 0  |
| <b>Peptoniphilus sp. oral taxon 836</b> | 0   | 1   | 0   | 0  | 0  |
| <b>Peptostreptococcus anaerobius</b>    | 2   | 0   | 0   | 0  | 0  |
| <b>Photorhabdus asymbiotica</b>         | 1   | 0   | 0   | 0  | 0  |
| <b>Photorhabdus luminescens</b>         | 3   | 0   | 0   | 0  | 0  |
| <b>Planococcus donghaensis</b>          | 1   | 0   | 0   | 0  | 0  |
| <b>Porphyromonas gingivalis</b>         | 0   | 1   | 0   | 0  | 0  |
| <b>Prevotella bivia</b>                 | 0   | 0   | 4   | 0  | 0  |
| <b>Prevotella buccae</b>                | 2   | 0   | 1   | 0  | 0  |
| <b>Prevotella copri</b>                 | 322 | 216 | 206 | 42 | 77 |
| <b>Prevotella loescheii</b>             | 0   | 0   | 6   | 0  | 0  |
| <b>Prevotella marshii</b>               | 4   | 0   | 0   | 0  | 0  |
| <b>Prevotella melaninogenica</b>        | 0   | 2   | 0   | 0  | 0  |
| <b>Prevotella oris</b>                  | 0   | 0   | 0   | 0  | 2  |
| <b>Prevotella salivae</b>               | 5   | 9   | 1   | 4  | 4  |
| <b>Prevotella sp.</b>                   | 12  | 0   | 6   | 0  | 0  |
| <b>Prevotella veroralis</b>             | 10  | 2   | 0   | 0  | 0  |
| <b>Propionibacterium freudenreichii</b> | 0   | 0   | 1   | 0  | 0  |
| <b>Pseudoflavonifractor capillosus</b>  | 8   | 0   | 0   | 0  | 15 |
| <b>Pseudomonas aeruginosa</b>           | 0   | 21  | 0   | 0  | 0  |
| <b>Rahnella sp.</b>                     | 0   | 1   | 0   | 0  | 0  |
| <b>Renibacterium salmoninarum</b>       | 0   | 2   | 0   | 0  | 0  |
| <b>Rhodobacter sphaeroides</b>          | 0   | 0   | 0   | 0  | 5  |
| <b>Rhodopseudomonas palustris</b>       | 0   | 0   | 0   | 0  | 3  |
| <b>Robiginitalea biformata</b>          | 3   | 0   | 0   | 0  | 0  |
| <b>Roseburia intestinalis</b>           | 13  | 22  | 4   | 0  | 2  |
| <b>Roseburia inulinivorans</b>          | 275 | 167 | 55  | 77 | 50 |
| <b>Roseburia sp.</b>                    | 1   | 0   | 0   | 0  | 0  |
| <b>Rothia dentocariosa</b>              | 0   | 0   | 0   | 8  | 0  |
| <b>Rothia mucilaginosa</b>              | 0   | 0   | 0   | 18 | 0  |

|                                                    |    |     |     |     |     |
|----------------------------------------------------|----|-----|-----|-----|-----|
| <i>Ruminococcus albus</i>                          | 0  | 12  | 7   | 4   | 2   |
| <i>Ruminococcus bromii</i>                         | 0  | 4   | 0   | 0   | 2   |
| <i>Ruminococcus champanellensis</i>                | 3  | 0   | 0   | 1   | 3   |
| <i>Ruminococcus lactaris</i>                       | 1  | 6   | 0   | 9   | 0   |
| <i>Ruminococcus sp.</i>                            | 13 | 6   | 8   | 66  | 12  |
| <i>Salinispora tropica</i>                         | 0  | 3   | 0   | 0   | 0   |
| <i>Salmonella bongori</i>                          | 0  | 0   | 0   | 1   | 0   |
| <i>Salmonella enterica</i>                         | 71 | 512 | 24  | 226 | 1   |
| <i>Serratia marcescens</i>                         | 0  | 3   | 0   | 0   | 0   |
| <i>Serratia odorifera</i>                          | 0  | 5   | 0   | 0   | 0   |
| <i>Serratia proteamaculans</i>                     | 3  | 4   | 0   | 0   | 0   |
| <i>Serratia symbiotica</i>                         | 0  | 1   | 0   | 0   | 0   |
| <i>Shigella boydii</i>                             | 23 | 295 | 53  | 35  | 6   |
| <i>Shigella dysenteriae</i>                        | 4  | 166 | 4   | 14  | 6   |
| <i>Shigella flexneri</i>                           | 75 | 856 | 190 | 123 | 136 |
| <i>Shigella sonnei</i>                             | 4  | 128 | 7   | 9   | 6   |
| <i>Shigella sp.</i>                                | 16 | 246 | 40  | 34  | 4   |
| <i>Sodalis glossinidius</i>                        | 0  | 0   | 6   | 0   | 0   |
| <i>Streptococcus parasanguinis</i>                 | 0  | 0   | 0   | 5   | 0   |
| <i>Streptococcus pyogenes</i>                      | 0  | 0   | 4   | 0   | 0   |
| <i>Streptococcus salivarius</i>                    | 2  | 0   | 0   | 0   | 0   |
| <i>Succinatimonas hippei</i>                       | 0  | 1   | 0   | 0   | 0   |
| <i>Sutterella wadsworthensis</i>                   | 6  | 0   | 2   | 6   | 5   |
| <i>Syntrophothermus lipocalidus</i>                | 16 | 0   | 0   | 0   | 0   |
| <i>Thermoanaerobacter brockii</i>                  | 0  | 4   | 0   | 6   | 4   |
| <i>Thermoanaerobacter ethanolicus</i>              | 0  | 0   | 0   | 6   | 4   |
| <i>Thermoanaerobacter pseudethanolicus</i>         | 0  | 0   | 2   | 9   | 6   |
| <i>Thermoanaerobacter sp.</i>                      | 0  | 0   | 2   | 24  | 16  |
| <i>Thermoanaerobacterium thermosaccharolyticum</i> | 1  | 0   | 0   | 0   | 0   |
| <i>Veillonella atypica</i>                         | 0  | 0   | 0   | 0   | 2   |
| <i>Veillonella parvula</i>                         | 0  | 58  | 1   | 0   | 6   |
| <i>Veillonella sp.</i>                             | 0  | 0   | 0   | 1   | 0   |
| <i>Yersinia frederiksenii</i>                      | 0  | 13  | 0   | 0   | 0   |
| <i>Yersinia pestis</i>                             | 0  | 0   | 0   | 38  | 0   |
| <b><i>buk</i>-gene sequence taxonomy</b>           |    |     |     |     |     |
| [ <i>Clostridium</i> ] <i>bartlettii</i>           | 0  | 2   | 22  | 16  | 0   |
| [ <i>Ruminococcus</i> ] <i>torques</i>             | 0  | 0   | 0   | 0   | 1   |
| <i>Abiotrophia defectiva</i>                       | 0  | 0   | 2   | 0   | 0   |
| <i>Alistipes sp.</i>                               | 0  | 1   | 0   | 0   | 0   |

|                                               |     |     |      |      |      |
|-----------------------------------------------|-----|-----|------|------|------|
| <b>Bacteroides caccae</b>                     | 0   | 0   | 22   | 6    | 18   |
| <b>Bacteroides coprocola</b>                  | 0   | 3   | 0    | 0    | 0    |
| <b>Bacteroides coprophilus</b>                | 0   | 0   | 0    | 0    | 1    |
| <b>Bacteroides dorei</b>                      | 0   | 2   | 0    | 0    | 0    |
| <b>Bacteroides eggerthii</b>                  | 0   | 2   | 0    | 0    | 0    |
| <b>Bacteroides fragilis</b>                   | 687 | 174 | 558  | 996  | 475  |
| <b>Bacteroides helcogenes</b>                 | 0   | 0   | 3    | 4    | 0    |
| <b>Bacteroides intestinalis</b>               | 0   | 3   | 0    | 0    | 0    |
| <b>Bacteroides ovatus</b>                     | 58  | 118 | 420  | 434  | 72   |
| <b>Bacteroides plebeius</b>                   | 0   | 0   | 0    | 0    | 2    |
| <b>Bacteroides sp.</b>                        | 837 | 229 | 1298 | 1836 | 579  |
| <b>Bacteroides stercoris</b>                  | 0   | 2   | 1    | 3    | 0    |
| <b>Bacteroides<br/>thetaiotaomicron</b>       | 513 | 0   | 541  | 652  | 693  |
| <b>Bacteroides vulgatus</b>                   | 0   | 0   | 25   | 40   | 0    |
| <b>Bacteroides<br/>xylanisolvans</b>          | 4   | 2   | 0    | 8    | 4    |
| <b>Bifidobacterium<br/>adolescentis</b>       | 0   | 0   | 0    | 0    | 5    |
| <b>Bifidobacterium<br/>angulatum</b>          | 2   | 0   | 0    | 0    | 0    |
| <b>butyrate-producing<br/>bacterium L2-50</b> | 76  | 115 | 70   | 128  | 399  |
| <b>butyrate-producing<br/>bacterium SSC/2</b> | 1   | 0   | 0    | 0    | 0    |
| <b>Catenibacterium<br/>mitsuokai</b>          | 0   | 0   | 4    | 0    | 0    |
| <b>Clostridiales bacterium</b>                | 0   | 7   | 23   | 0    | 0    |
| <b>Clostridium botulinum</b>                  | 0   | 0   | 0    | 0    | 2    |
| <b>Clostridium nexile</b>                     | 0   | 0   | 0    | 0    | 2    |
| <b>Clostridium<br/>phytofermentans</b>        | 0   | 0   | 0    | 3    | 0    |
| <b>Clostridium sp.</b>                        | 263 | 244 | 170  | 322  | 798  |
| <b>Clostridium tetani</b>                     | 0   | 0   | 32   | 0    | 0    |
| <b>Coprococcus comes</b>                      | 0   | 0   | 81   | 0    | 492  |
| <b>Coprococcus eutactus</b>                   | 108 | 0   | 0    | 0    | 1070 |
| <b>Eubacterium bifforme</b>                   | 0   | 0   | 0    | 26   | 0    |
| <b>Eubacterium hallii</b>                     | 0   | 0   | 38   | 96   | 122  |
| <b>Eubacterium rectale</b>                    | 327 | 157 | 209  | 360  | 294  |
| <b>Eubacterium ventriosum</b>                 | 90  | 4   | 6    | 0    | 0    |
| <b>Faecalibacterium<br/>prausnitzii</b>       | 0   | 0   | 0    | 0    | 1    |
| <b>Klebsiella pneumoniae</b>                  | 0   | 0   | 0    | 0    | 9    |
| <b>Lachnospiraceae<br/>bacterium</b>          | 1   | 0   | 0    | 0    | 0    |
| <b>Parabacteroides<br/>johnsonii</b>          | 0   | 2   | 0    | 0    | 0    |
| <b>Parabacteroides merdae</b>                 | 0   | 2   | 0    | 0    | 2    |
| <b>Prevotella buccalis</b>                    | 0   | 0   | 0    | 2    | 0    |

|                                 |   |   |   |   |   |
|---------------------------------|---|---|---|---|---|
| <b>Prevotella copri</b>         | 9 | 0 | 0 | 0 | 3 |
| <b>Roseburia inulinivorans</b>  | 0 | 2 | 0 | 0 | 0 |
| <b>Ruminococcus sp.</b>         | 0 | 0 | 0 | 0 | 2 |
| <b>Saccharomyces cerevisiae</b> | 0 | 0 | 0 | 0 | 4 |
| <b>Shuttleworthia satelles</b>  | 0 | 2 | 0 | 0 | 0 |
| <b>Streptococcus sanguinis</b>  | 3 | 0 | 0 | 0 | 0 |

Supplementary Table S4: 16S rRNA gene clone library analysis summary

| Subject ID | Sequences (N) | dOTU | Shannon (H) | Simpson (D) | IKF    | sOTU | K/As | N/As |
|------------|---------------|------|-------------|-------------|--------|------|------|------|
| HLT1       | 376           | 56   | 2.31906     | 0.247688    | 0.274  | 121  | 307  | 69   |
| HLT2       | 334           | 71   | 3.23447     | 0.0820701   | 0.3534 | 139  | 227  | 107  |
| HLT3       | 381           | 63   | 2.5302      | 0.233112    | 0.2853 | 120  | 237  | 144  |
| HLT4       | 332           | 55   | 2.60901     | 0.139228    | 0.3156 | 120  | 249  | 83   |
| HLT5       | 342           | 36   | 1.59354     | 0.423111    | 0.2237 | 77   | 272  | 70   |
| HLT6       | 387           | 68   | 3.06645     | 0.104203    | 0.3303 | 147  | 258  | 129  |
| HLT7       | 350           | 75   | 2.84163     | 0.166811    | 0.3061 | 143  | 271  | 79   |
| KSD1       | 342           | 82   | 3.44493     | 0.0748229   | 0.2467 | 129  | 125  | 217  |
| KSD2       | 336           | 20   | 1.33636     | 0.420291    | 0.2578 | 42   | 317  | 19   |
| KSD3       | 349           | 28   | 2.11976     | 0.19308     | 0.2974 | 53   | 334  | 15   |
| KSD4       | 377           | 20   | 1.62897     | 0.367007    | 2374   | 45   | 247  | 130  |
| KSD7       | 349           | 48   | 2.63289     | 0.167161    | 0.3137 | 78   | 231  | 118  |
| KSD9       | 469           | 42   | 2.47629     | 0.135404    | 0.3449 | 107  | 412  | 57   |
| KSD10      | 333           | 43   | 2.37667     | 0.221408    | 0.2959 | 87   | 197  | 136  |

**dOTU**-Number of OTUs formed at 97 % sequence similarity using DOTUR algorithm.

**IKF**-Index derived from K Shuff algorithm (Jangid et. al., 2016).

**sOTU**-Number of OTUs formed at 97 % sequence similarity using Silva123 database by open-reference OTU generation in QIIME.

**K/As or N/As**-Number of library sequences gained or fails respectively to taxonomic assignments at 97 % sequence similarity using EzTaxon database to the sOTUs.

Supplementary Table S5: List of Eubacterial species ( $\geq 97\%$  Identity cut-off)  
 derived from 16S rRNA gene clone library

| OTU ID    | Similarity (%) | EzTaxon_Taxonomy                              |
|-----------|----------------|-----------------------------------------------|
| 338145    | 99.21          | Olsenella umbonata                            |
| 184745    | 100            | Collinsella aerofaciens                       |
| 180133    | 99.13          | Barnesiella intestinihominis                  |
| 772282    | 99.69          | Alistipes shahii                              |
| 216599    | 99.53          | Alistipes ihumii                              |
| 199716    | 99.89          | Bacteroides dorei                             |
| 174646    | 98.91          | Bacteroides thetaiotaomicron                  |
| 4454586   | 99.37          | Odoribacter splanchnicus                      |
| 327050    | 99.84          | Bacteroides massiliensis                      |
| 165118    | 99.2           | Paraprevotella clara                          |
| 332317    | 99.52          | Bacteroides ovatus                            |
| 183603    | 99.69          | Bacteroides fragilis                          |
| 184610    | 99.67          | Bacteroides caccae                            |
| 184753    | 99.67          | Bacteroides vulgatus                          |
| 213813    | 100            | Bacteroides plebeius                          |
| 359538    | 99.77          | Bacteroides stercoris                         |
| 209685    | 99.78          | Bacteroides coprocola                         |
| 350277    | 100            | Bacteroides uniformis                         |
| denovo303 | 99.78          | Prevotella stercorea                          |
| 174842    | 98.13          | Parabacteroides distasonis                    |
| 307571    | 99.06          | Prevotella copri                              |
| denovo296 | 99.89          | Parabacteroides merdae                        |
| 3385021   | 100            | Staphylococcus epidermidis                    |
| 4369988   | 99.85          | Streptococcus gallolyticus subsp. macedonicus |
| 586141    | 100            | Lactobacillus delbrueckii subsp. sunkii       |
| 4320317   | 99.84          | Streptococcus tigurinus                       |
| 131660    | 99.68          | Lactobacillus delbrueckii subsp. indicus      |
| 2901965   | 99.9           | Streptococcus vestibularis                    |
| 802262    | 99.89          | Streptococcus sanguinis                       |
| 579608    | 99.87          | Streptococcus salivarius subsp. thermophilus  |
| 338757    | 99.88          | Lactobacillus mucosae                         |
| 4447476   | 99.09          | Bacillus sonorensis                           |
| 3244896   | 99.76          | Streptococcus infantarius subsp. coli         |
| 178213    | 99.7           | Lactobacillus ruminis                         |
| 289925    | 99.44          | Streptococcus lutetiensis                     |
| denovo390 | 99.22          | Turicibacter sanguinis                        |
| 1978955   | 99.24          | Subdoligranulum variabile                     |
| 2101287   | 99.68          | Eubacterium ramulus                           |
| 185603    | 98.88          | Coprococcus comes                             |
| 197675    | 99.77          | Eubacterium hallii                            |



| <b>OTU ID</b> | <b>Similarity (%)</b> | <b>EzTaxon_Taxonomy</b>          |
|---------------|-----------------------|----------------------------------|
| 3376513       | 99.06                 | Ruminococcus gnavus              |
| 105440        | 99.73                 | Blautia faecis                   |
| 4481427       | 99.7                  | Roseburia intestinalis           |
| 2582660       | 99.85                 | Blautia obeum                    |
| denovo516     | 98.17                 | Acidaminococcus fermentans       |
| 851704        | 98.4                  | Parvimonas micra                 |
| 4381303       | 99.08                 | Clostridium citroniae            |
| 16054         | 99.61                 | Ruminococcus callidus            |
| 187932        | 99.36                 | Blautia luti                     |
| 181016        | 100                   | Eubacterium siraeum              |
| 13811         | 99.05                 | Mitsuokella multacida            |
| 174654        | 99.88                 | Ruminococcus bromii              |
| 514988        | 97.5                  | Romboutsia lituseburensis        |
| 270382        | 98.84                 | Romboutsia ilealis               |
| 4475758       | 99.15                 | Veillonella dispar               |
| denovo273     | 99.56                 | Dialister succinatiphilus        |
| 2313540       | 100                   | Lactobacillus rogosae            |
| 181193        | 99.89                 | Butyrivibrio crossotus           |
| 193975        | 99.88                 | Coprococcus catus                |
| 190679        | 99                    | Coprococcus eutactus             |
| 4422456       | 98.79                 | Veillonella rogosae              |
| 4374302       | 100                   | Dorea formicigenerans            |
| 3754926       | 99.89                 | Anaerostipes hadrus              |
| 4391625       | 99.21                 | Veillonella denticariosi         |
| 181543        | 99.76                 | Dorea longicatena                |
| 2229500       | 99.84                 | Gemmiger formicilis              |
| 223773        | 98.78                 | Megamonas funiformis             |
| 149335        | 99.26                 | Mitsuokella jalaludinii          |
| 191797        | 98.77                 | Clostridium celatum              |
| 4358919       | 100                   | Roseburia inulinivorans          |
| 264967        | 99.36                 | Megasphaera indica               |
| 176269        | 100                   | Eubacterium eligens              |
| 195207        | 99.78                 | Roseburia faecis                 |
| 266210        | 99.68                 | Megasphaera elsdenii             |
| 197004        | 100                   | Eubacterium rectale              |
| 4478125       | 99.68                 | Faecalibacterium prausnitzii     |
| 193623        | 100                   | Holdemanella biformis            |
| 4480861       | 97.81                 | Catenibacterium mitsuokai        |
| denovo503     | 99.89                 | Blautia wexlerae                 |
| 2201995       | 99.68                 | Sutterella wadsworthensis        |
| 112891        | 99.11                 | Parasutterella excrementihominis |
| 509447        | 100                   | Comamonas testosteroni           |
| 4344722       | 99.22                 | Shigella boydii                  |

| <b>OTU ID</b> | <b>Similarity (%)</b> | <b>EzTaxon_Taxonomy</b>                 |
|---------------|-----------------------|-----------------------------------------|
| 566243        | 99.69                 | Shigella dysenteriae                    |
| 4457268       | 99.68                 | Shigella flexneri                       |
| 231787        | 99.49                 | Escherichia fergusonii                  |
| 4333020       | 99.77                 | Enterobacter cloacae subsp. cloacae     |
| 2529285       | 99.77                 | Enterobacter xiangfangensis             |
| 197286        | 99.67                 | Klebsiella pneumoniae subsp. pneumoniae |
| 524117        | 97.2                  | Succinivibrio dextrinosolvens           |

Supplementary Table S6: List of Trans-domain species derived from targeted-metagenome

| <b>Trans-domain species</b>            | <b>KSD_HLT</b> | <b>KSD_OX_COL</b> | <b>KSD_OX_N_COL</b> | <b>KSD_FH</b> | <b>KSD_THIRD</b> |
|----------------------------------------|----------------|-------------------|---------------------|---------------|------------------|
| <b>18S rRNA gene sequence taxonomy</b> |                |                   |                     |               |                  |
| Blastocystis hominis                   | 4188           | 15                | 1                   | 112           | 860              |
| Kazachstania viticola                  | 371            | 0                 | 1381                | 0             | 0                |
| Hanseniaspora guilliermondii           | 6              | 0                 | 0                   | 0             | 0                |
| Foaina nana                            | 3              | 0                 | 0                   | 0             | 0                |
| Syngamus trachea                       | 2              | 0                 | 0                   | 0             | 0                |
| Entamoeba dispar                       | 1              | 0                 | 0                   | 0             | 0                |
| Entamoeba moshkovskii                  | 1              | 0                 | 0                   | 0             | 0                |
| Arthrimum puccinioides                 | 0              | 1                 | 0                   | 0             | 0                |
| Aspergillus penicillioides             | 0              | 1                 | 0                   | 3             | 0                |
| Aureobasidium pullulans                | 0              | 0                 | 0                   | 6             | 0                |
| Boeremia exigua                        | 0              | 0                 | 1                   | 0             | 0                |
| Caenorhabditis plicata                 | 0              | 0                 | 0                   | 1             | 0                |
| Candida geochares                      | 0              | 0                 | 0                   | 3748          | 0                |
| Candida magnoliae                      | 0              | 0                 | 0                   | 1             | 0                |
| Candida orthopsilosis                  | 0              | 2                 | 1                   | 3             | 0                |
| Candida piceae                         | 0              | 0                 | 0                   | 1             | 0                |
| Candida tropicalis                     | 0              | 0                 | 0                   | 14            | 0                |
| Davidiella tassiana                    | 0              | 0                 | 1                   | 0             | 0                |
| Dioszegia crocea                       | 0              | 0                 | 0                   | 1             | 0                |
| Enteromonas hominis                    | 0              | 0                 | 0                   | 7             | 0                |
| Gibberella zeae                        | 0              | 0                 | 1                   | 0             | 0                |
| Kodamaea ohmeri                        | 0              | 0                 | 0                   | 1             | 0                |
| Lobophora variegata                    | 0              | 0                 | 0                   | 1             | 0                |
| Metarhizium anisopliae                 | 0              | 0                 | 0                   | 1             | 0                |

| <b>Trans-domain species</b>         | <b>KSD_HLT</b> | <b>KSD_OX_COL</b> | <b>KSD_OX_N_COL</b> | <b>KSD_FH</b> | <b>KSD_THIRD</b> |
|-------------------------------------|----------------|-------------------|---------------------|---------------|------------------|
| Microdochium nivale                 | 0              | 0                 | 0                   | 1             | 0                |
| Mycosphaerella punctiformis         | 0              | 0                 | 0                   | 1             | 0                |
| Ophiocordyceps heteropoda           | 0              | 1                 | 0                   | 0             | 0                |
| Phaeosphaeria nodorum               | 0              | 0                 | 0                   | 1             | 0                |
| Physalospora scirpi                 | 0              | 1                 | 0                   | 0             | 0                |
| Pichia kudriavzevii                 | 0              | 0                 | 739                 | 0             | 0                |
| Resinicium bicolor                  | 0              | 0                 | 0                   | 1             | 0                |
| Rhizopus stolonifer                 | 0              | 0                 | 0                   | 1             | 0                |
| Saccharomyces cerevisiae            | 0              | 0                 | 0                   | 0             | 4                |
| Schistosoma mansoni                 | 0              | 0                 | 0                   | 8             | 0                |
| Sporisorium reilianum               | 0              | 0                 | 0                   | 7             | 0                |
| Steinernema glaseri                 | 0              | 1                 | 0                   | 0             | 0                |
| Wickerhamiella domercqiae           | 0              | 0                 | 0                   | 1             | 0                |
| <b>ITS region sequence taxonomy</b> |                |                   |                     |               |                  |
| Aspergillus niger                   | 71             | 71                | 96                  | 74            | 29               |
| Aspergillus caesiellus              | 42             | 188               | 1                   | 0             | 1                |
| Macrophomina phaseolina             | 41             | 5                 | 142                 | 144           | 16               |
| Coprinus comatus                    | 5              | 5                 | 2                   | 0             | 8                |
| Aspergillus sydowii                 | 3              | 75                | 0                   | 4             | 1                |
| Saccharomyces cerevisiae            | 2              | 147               | 5                   | 0             | 7                |
| Botryosphaeria dothidea             | 0              | 0                 | 136                 | 3             | 1                |
| Lasiodiplodia theobromae            | 0              | 0                 | 0                   | 4             | 1                |
| Cladosporium cladosporioides        | 0              | 0                 | 35                  | 4             | 18               |

| <b>Trans-domain species</b>                     | <b>KSD_HLT</b> | <b>KSD_OX_COL</b> | <b>KSD_OX_N_COL</b> | <b>KSD_FH</b> | <b>KSD_THIRD</b> |
|-------------------------------------------------|----------------|-------------------|---------------------|---------------|------------------|
| Phoma multirostrata                             | 0              | 0                 | 0                   | 2             | 1                |
| Aspergillus candidus                            | 0              | 1                 | 6                   | 14            | 4                |
| Aspergillus flavus                              | 0              | 0                 | 1                   | 5             | 17               |
| Aspergillus fumigatus                           | 0              | 1                 | 42                  | 2             | 2                |
| Aspergillus penicillioides                      | 0              | 0                 | 4                   | 0             | 39               |
| Emericella nidulans                             | 0              | 0                 | 0                   | 22            | 1                |
| Eurotium amstelodami                            | 0              | 0                 | 55                  | 0             | 14               |
| Arthroderma benhamiae                           | 0              | 0                 | 3                   | 47            | 1                |
| Kodamaea ohmeri                                 | 0              | 0                 | 88                  | 0             | 7                |
| Pichia kudriavzevii                             | 0              | 0                 | 68                  | 98            | 13               |
| Kluyveromyces marxianus                         | 0              | 0                 | 4                   | 6             | 1                |
| Candida inconspicua                             | 0              | 0                 | 74                  | 6             | 1                |
| Candida tropicalis                              | 0              | 0                 | 97                  | 8             | 6                |
| Ilyonectria radicola                            | 0              | 0                 | 24                  | 0             | 2                |
| Pholiota squarrosa                              | 0              | 0                 | 0                   | 3             | 1                |
| Rhodotorula mucilaginosa                        | 0              | 0                 | 5                   | 1             | 1                |
| <b>Archaeal 16S rRNA gene sequence taxonomy</b> |                |                   |                     |               |                  |
| Methanobrevibacter smithii                      | 4028           | 22452             | 3418                | 10206         | 9126             |
| Methanobrevibacter gottschalkii                 | 2507           | 1                 | 0                   | 2             | 0                |
| Methanosphaera stadtmanae                       | 1333           | 3850              | 310                 | 1306          | 3071             |
| Methanobrevibacter arboriphilus                 | 360            | 1                 | 0                   | 1             | 0                |
| Methanobacterium bryantii                       | 98             | 0                 | 1                   | 0             | 1                |
| Candidatus Nitrososphaera gargensis             | 49             | 0                 | 1                   | 0             | 1                |

| <b>Trans-domain species</b>      | <b>KSD_HLT</b> | <b>KSD_OX_COL</b> | <b>KSD_OX_N_COL</b> | <b>KSD_FH</b> | <b>KSD_THIRD</b> |
|----------------------------------|----------------|-------------------|---------------------|---------------|------------------|
| Halococcus dombrowskii           | 7              | 0                 | 0                   | 0             | 0                |
| Methanobrevibacter woesei        | 4              | 3                 | 0                   | 17            | 2                |
| Methanobacterium alcaliphilum    | 4              | 0                 | 0                   | 0             | 0                |
| Methanobrevibacter ruminantium   | 3              | 0                 | 0                   | 8             | 0                |
| Haloferax sulfurifontis          | 2              | 0                 | 0                   | 0             | 0                |
| Methanosaeta concilii            | 0              | 2                 | 0                   | 288           | 0                |
| Methanoculleus palmolei          | 0              | 0                 | 0                   | 41            | 0                |
| Methanofollis liminatans         | 0              | 0                 | 0                   | 19            | 0                |
| Methanospirillum hungatei        | 0              | 0                 | 0                   | 15            | 0                |
| Methanoregula boonei             | 0              | 0                 | 0                   | 9             | 0                |
| Methanobrevibacter millerae      | 0              | 0                 | 0                   | 9             | 1                |
| Thermoplasma volcanium           | 0              | 0                 | 0                   | 9             | 0                |
| Methanocorpusculum bavaricum     | 0              | 0                 | 0                   | 5             | 0                |
| Methanobacterium sp. MB4         | 0              | 0                 | 0                   | 1             | 0                |
| Haloarcula sinaiensis            | 0              | 0                 | 1                   | 0             | 0                |
| Methanobacterium subterraneum    | 0              | 0                 | 0                   | 0             | 6                |
| Methanobrevibacter oralis        | 0              | 2                 | 0                   | 0             | 0                |
| Methanomethylovorans thermophila | 0              | 5                 | 0                   | 0             | 0                |
